# Sex-related differences in catheter ablation of atrial fibrillation: a systematic review and meta-analysis

Xiaocheng Cheng<sup>1</sup>, Qiongwen Hu<sup>2</sup>, Lei Gao<sup>1</sup>, Jian Liu<sup>1</sup>, Shu Qin<sup>1</sup>, and Dongying Zhang<sup>1</sup>\* 

<sup>1</sup>Department of Cardiology, The First Affiliated Hospital of Chongqing Medical University, 1 Youyi Rd, Chongqing 400016, China; and <sup>2</sup>Department of Clinical Laboratory, Chongqing General Hospital, Chongqing 400014, China

Received 29 December 2018; editorial decision 1 June 2019; accepted 5 June 2019; online publish-ahead-of-print 8 July 2019

## Aims

The sex-related differences in the clinical outcomes of rhythm and safety after catheter ablation remain unclear. The purpose of this study was to compare the clinical outcomes of catheter ablation for atrial fibrillation (AF) in women and men.

## Methods and results

The Medline and EMBASE databases were searched for published articles up to December 2018. Studies that met our predefined inclusion criteria were included. The primary endpoints were freedom from AF/atrial tachycardia (AT) recurrence, stroke/transient ischaemic attack (TIA), and all-cause mortality. After literature search and detailed assessment, 19 observational studies (151 370 patients; 34% women) were identified. Our analyses showed that the rate of freedom from AF/AT recurrence was lower in women than men at the 2.4-year follow-up [odds ratio (OR): 0.75, 95% confidence interval (CI) 0.69–0.81;  $P < 0.0001$ ]. Moreover, women had an increased risk of stroke/TIA (OR: 1.42, 95% CI 1.21–1.67;  $P < 0.0001$ ) and all-cause mortality (OR: 1.53, 95% CI 1.02–2.28;  $P = 0.04$ ). Nevertheless, for the endpoint of all-cause mortality, there was no significant difference between the two genders in the subgroup of prospective studies (OR: 1.19, 95% CI 0.69–2.05;  $P = 0.53$ ). Additionally, women were more likely to experience major complications compared with men (pericardial effusion/tamponade, major bleeding requiring transfusion, and pacemaker implantation).

## Conclusions

Women who underwent catheter ablation of AF might experience lower efficacy and a higher risk of stroke/TIA and major complications than men. The reasons for these sex-related differences need to be further studied.

## Keywords

Atrial fibrillation • Catheter ablation • Sex • Meta-analysis

## Introduction

Over the past two decades, catheter ablation has emerged as a safe and effective therapy for the management of atrial fibrillation (AF) and has been associated with a reduction in AF burden and stroke, as well as with improvement in symptoms and quality of life. Catheter ablation is currently recommended as a reasonable alternative first-line therapy for the treatment of drug-resistant AF.<sup>1</sup> Despite the high efficacy of catheter ablation, the number of women who undergo pulmonary vein (PV) isolation is

remarkably less than that of men.<sup>2</sup> Additionally, the majority of studies that investigate rhythm and safety outcomes of catheter ablation for AF have consisted predominantly of males.<sup>2,3</sup> Patient stratification and individualized therapy are crucial to optimizing the effectiveness and safety of catheter ablation. However, there is a paucity of data on the effectiveness and safety of catheter ablation in a large cohort study of women. Therefore, we conducted a systematic review and meta-analysis to investigate the clinical outcomes associated with catheter ablation of AF in women vs. men.

\* Corresponding author. Tel: +86 150 2531 6809; fax: +86 23 6621 5269. E-mail address: cqmezdy@yeah.net

Published on behalf of the European Society of Cardiology. All rights reserved. © The Author(s) 2019. For permissions, please email: journals.permissions@oup.com.

### What's new?

- The sex-related differences in the clinical outcomes of rhythm and safety after catheter ablation of atrial fibrillation (AF) remain unclear. Nineteen observational studies with a total of 151 370 patients were identified.
- Our study showed that female sex might be associated with a lower proportion of patients free from AF/atrial tachycardia recurrence after catheter ablation. Moreover, female sex had an increased risk of stroke/transient ischaemic attack and major complications compared with male sex.
- Our data provided physicians and their patients with real-world information about sex-specific outcomes of catheter ablation of AF. The reasons for these sex-related differences need to be further studied.

## Methods

### Data sources and searches

To identify all the published clinical studies that compared outcomes of catheter ablation of AF in women and men, we performed a comprehensive online search of the literature through the Medline and EMBASE databases (to December 2018), without language restriction. The retrieval strategy used relevant keywords and medical subject heading terms including the following: 'atrial fibrillation', 'gender', 'sex', 'men', 'women', 'male', 'female', 'pulmonary vein isolation', and 'ablation' both separately and in combination. The bibliographies of the reviewed manuscripts were manually retrieved to avoid missing relevant data.

### Study selection

Studies were included if they reported primary endpoints of interest in patients undergoing catheter ablation of AF and if they provided detailed information on women vs. men within the main article or subgroup. Catheter ablation was defined as an endocardial ablation procedure (radiofrequency or cryoablation). Inclusion criteria were as follows: (i) studies had to provide reliable data on the assessment of at least one of the primary endpoints; (ii) to minimize the risk of small-study effects, all studies were required to have a minimum of 500 individuals; and (iii) endpoints were reported as numerical events rather than only as hazard ratios, relative risk, or odds rate. If relevant data were not reported in the published articles, we tried to contact the corresponding authors to acquire further information. To ensure that studies were eligible for the prespecified inclusion criteria, retrieval results were reviewed by three authors (C.X., H.Q., and G.L.), who needed to agree on study selection.

### Outcomes and definitions

The primary endpoints were the incidence rates of freedom from AF/atrial tachycardia (AT) recurrence, stroke/transient ischaemic attack (TIA), and all-cause mortality. Secondary endpoints were major complications including: pericardial effusion/tamponade, major bleeding requiring transfusion, permanent pacemaker implantation (PMI), PV stenosis, and acute coronary syndrome (ACS). Freedom from AF/AT recurrence was defined as no episode of AF, flutter or tachycardia  $\geq 30$  s in duration after a 1- or 3-month blanking period off of antiarrhythmic drugs (AADs). Stroke/TIA and all-cause mortality were defined as new onset of stroke/TIA and death from any cause occurring during hospitalization or follow-up. Acute coronary syndrome was defined as acute myocardial infarction

(MI) or unstable angina. PV stenosis was defined as moderate to severe stenosis of PV or PV stenosis requiring therapeutic intervention.

### Data extraction and quality assessment

Data extraction and presentation for the preparation of this manuscript followed the recommendations of the Preferred Reporting Items for Systematic Reviews and Meta-Analyses (Supplementary material online, Table S1).<sup>4</sup> Data abstraction was conducted by three authors (C.X., H.Q., and G.L.), who independently used a predefined, standardized protocol, and data collection instrument. The following study-, patient-, and procedure-related data were extracted from the main paper. Any discrepancies were resolved by discussion among the authors. The Newcastle–Ottawa Quality Assessment Scale (NOS) for observational trials was used to evaluate the quality of the included studies.<sup>5</sup> The NOS scale consists of eight questions with nine possible points. We judged the data based on the selection of populations, the comparability of the groups, and the exposure/outcome of interest by a star system.

### Data synthesis and analysis

The odds ratio (OR) with 95% confidence intervals (CIs) was used to analyse dichotomous data, whereas continuous variables were analysed using weighted mean differences. The presence of heterogeneity among studies was evaluated by the Cochran Q test, and the extent of the observed heterogeneity was evaluated by the Higgins  $I^2$  test, which suggests 0–25%, 25–50%, and 50–75% as low, moderate, and high heterogeneity, respectively. In view of the intrinsic differences in study design and demographics, a random-effects model was used to estimate the pooled effects of our meta-analyses.

For the primary endpoints, prespecified sensitivity analyses were performed by iteratively removing one study at a time to confirm that our results were not significantly affected by any single study. Multiple subgroup analyses (according to study design, study quality, and age of patients) were performed to further test the stability of our meta-analysis. To inspect the effect of preselected covariates on the overall effect, we conducted a random-effects meta-regression analysis. The logarithm of OR for the primary endpoints, weighted by the inverse variance of each study, was regressed against age, percentage of hypertension, diabetes mellitus (DM), coronary artery disease (CAD), stroke, smoking history, left ventricular ejection fraction (LVEF), and size of left atrial (LA) diameter in both groups. To detect any publication bias in the primary endpoints, we examined in detail the asymmetry of the funnel plots and further assessed them using the Begg adjusted rank correlation test and the Egger regression asymmetry test. The RevMan software package (Review Manager, Version 5.3) and STATA software 12.0 were used to perform all statistical analyses. *P*-values were two-tailed, and *P*-value  $< 0.05$  was considered statistically significant.

## Results

### Characteristics of included studies

Initially, 4461 potentially relevant studies were identified by our search strategy. A total of 4388 of these were excluded according to the evaluation of the title and abstract (Figure 1). Fifty-four of the remaining studies were excluded after detailed full-text review as follows: lack of outcomes of interest ( $n = 23$ ), duplicates ( $n = 10$ ), reviews ( $n = 7$ ), sample size  $< 500$  ( $n = 7$ ), surgical epicardial ablation ( $n = 5$ ), and insufficient dates for analysis ( $n = 2$ ). After critical appraisal, 19 studies (nine prospective and 10 retrospective

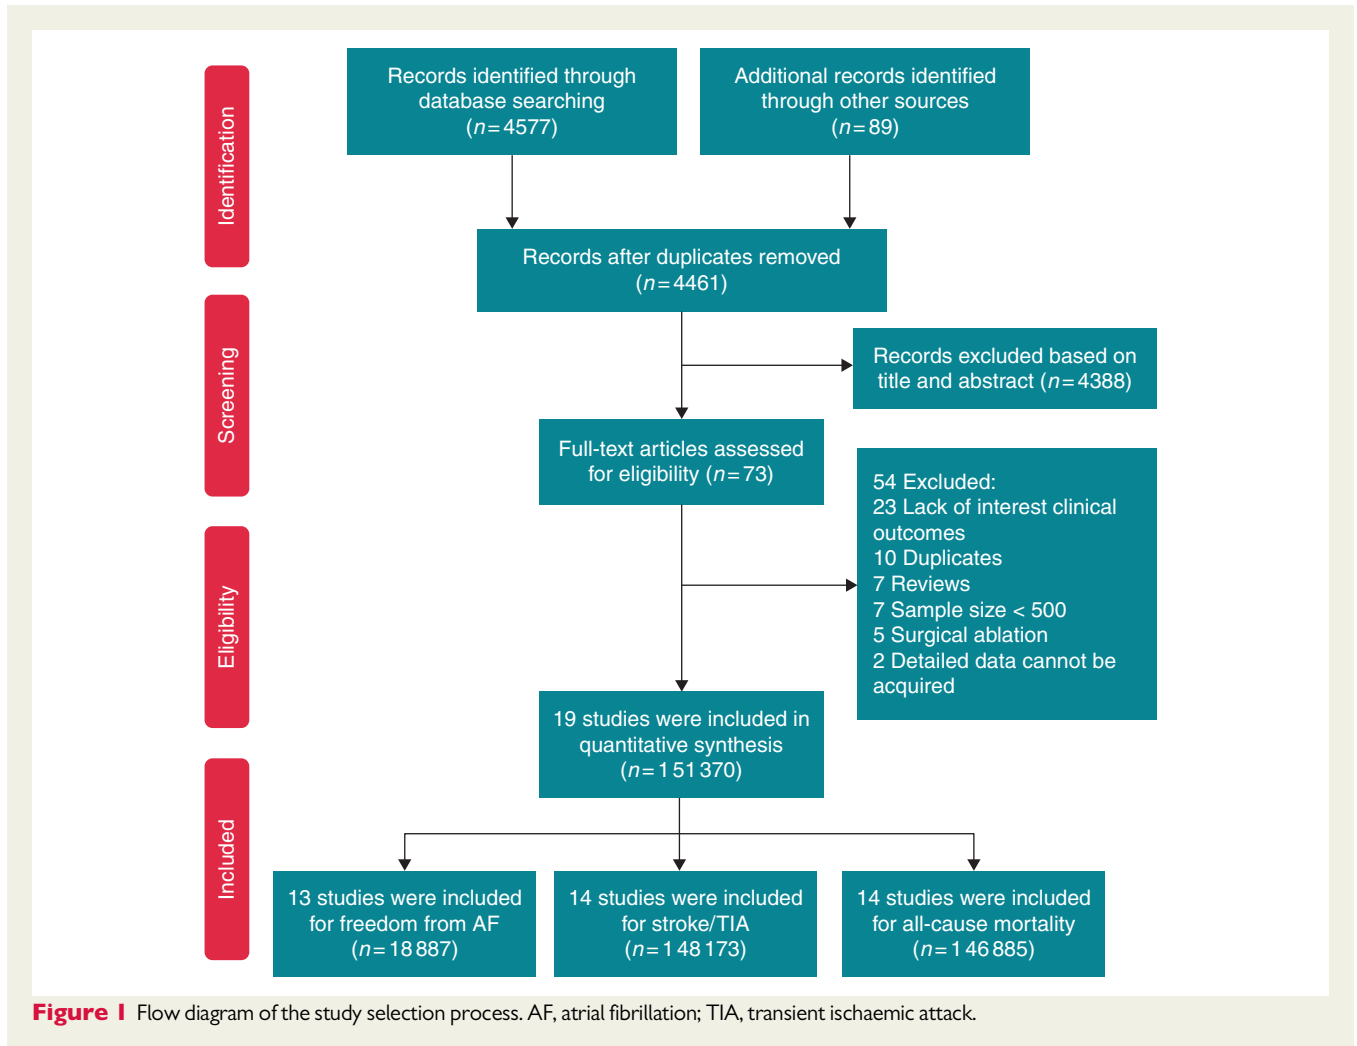

observational studies) published between 2010 and 2018 met our eligibility criteria and reported desired clinical endpoints of catheter ablation in women compared with men.<sup>6–24</sup>

Table 1 summarizes the baseline characteristics of the included studies. Of the 151 370 patients, 50 846 (34%) women underwent catheter ablation for AF. Because different demographics existed in the endpoints of rhythm and safety outcomes, we summarized baseline demographics for freedom from AF/AT recurrence and complications, respectively (Table 2). For the endpoints of freedom from AF/AT recurrence, women undergoing catheter ablation were more likely to be older and to have previous stroke and hypertension. In contrast, men were more likely to have previous DM, CAD, and MI and to have enlarged LA diameter, increased body mass index and less paroxysmal AF (Table 2 and Supplementary material online, Table S2). For the endpoints of safety, women undergoing catheter ablation were more likely to be older and to have previous DM, hypertension, stroke, chronic kidney disease, and valvular heart disease. Men were more likely to have previous CAD, heart failure, and MI (Table 2 and Supplementary material online, Table S2). Fifteen studies were

evaluated as good quality (NOS  $\geq 6$ ), indicating a low risk of bias (Supplementary material online, Table S3).

### Freedom from atrial fibrillation/at recurrence

Thirteen studies with 18 887 patients were included in the quantitative synthesis of freedom from AF/AT recurrence in women vs. men. Low heterogeneity was detected among these studies ( $P = 0.30$ ;  $I^2 = 14\%$ ; Supplementary material online, Figure S1). Pooled analysis showed that the rate of freedom from AF/AT recurrence was significantly lower in women than men at the 2.4-year follow-up (61.2% vs. 68.6%; OR 0.75, 95% CI: 0.69–0.81;  $P < 0.0001$ ). The sex-related difference in freedom from AF/AT recurrence was independent of follow-up time (at 1 year, OR: 0.74, 95% CI: 0.65–84;  $P < 0.0001$ ; at 1–3 years, OR: 0.69, 95% CI: 0.59–81;  $P < 0.0001$ ; at  $\geq 3$  years, OR: 0.73, 95% CI: 0.61–88;  $P = 0.0007$ ; Figure 2). In addition, similar results were found in the subsets of patients without AAD therapy (OR: 0.75, 95% CI: 0.67–83;  $P < 0.0001$ ; Supplementary material online, Figure S2), paroxysmal AF (OR: 0.71, 95% CI: 0.61–81;  $P < 0.0001$ ),

**Table 1** Baseline characteristics of the included studies

| Study/(ref. #)                 | Year | Study design                   | Region        | Single/<br>multicentre | PAF (%)      | Size (n),<br>(female %) | Reported<br>primary<br>outcomes                  | Follow-up<br>(year) | NOS<br>points |
|--------------------------------|------|--------------------------------|---------------|------------------------|--------------|-------------------------|--------------------------------------------------|---------------------|---------------|
| Arshad et al. <sup>6</sup>     | 2010 | Retrospective<br>Observational | United States | Single                 | 463 (81.7)   | 567 (29)                | Freedom from AF                                  | 1.00                | 6             |
| Patel et al. <sup>7</sup>      | 2010 | Retrospective<br>Observational | United States | Multicentre            | 1743 (53.4)  | 3265 (16)               | Freedom from AF,<br>stroke/TIA, and<br>mortality | 2.81                | 6             |
| Ammar et al. <sup>8</sup>      | 2011 | Retrospective<br>Observational | Germany       | Single                 | 503 (100.0)  | 503 (33)                | Freedom from AF<br>and stroke/TIA                | 3.40                | 5             |
| Winkle et al. <sup>9</sup>     | 2011 | Prospective<br>Observational   | United States | Single                 | 270 (32.0)   | 843 (28)                | Freedom from AF<br>and mortality                 | 2.40                | 6             |
| Yagishita et al. <sup>10</sup> | 2011 | Retrospective<br>Observational | Japan         | Single                 | 362 (69.1)   | 524 (19)                | Freedom from AF,<br>stroke/TIA, and<br>mortality | 3.67                | 5             |
| Mohanty et al. <sup>11</sup>   | 2011 | Prospective<br>Observational   | United States | Single                 | 140 (24.6)   | 568 (27)                | Freedom from AF                                  | 1.00                | 8             |
| Zakeri et al. <sup>12</sup>    | 2012 | Retrospective<br>Observational | United States | Single                 | 289 (40.9)   | 707 (26)                | Freedom from AF                                  | 1.00                | 4             |
| Shoemaker et al. <sup>13</sup> | 2013 | Prospective<br>Observational   | United States | Single                 | 238 (46.5)   | 512 (29)                | Mortality                                        | In-hospital         | 6             |
| Takigawa et al. <sup>14</sup>  | 2013 | Retrospective<br>Observational | Japan         | Single                 | 1124 (100.0) | 1124 (23)               | Freedom from AF,<br>stroke/TIA, and<br>mortality | 3.25                | 7             |
| Stabile et al. <sup>15</sup>   | 2015 | Prospective<br>Observational   | Italian       | Multicentre            | NR           | 2323 (28)               | Stroke/TIA and<br>mortality                      | 30 day              | 6             |
| Kornej et al. <sup>16</sup>    | 2015 | Prospective<br>Observational   | German        | Single                 | 1292 (62.4)  | 2069 (34)               | Stroke/TIA                                       | 1.50                | 6             |
| Zylla et al. <sup>17</sup>     | 2016 | Prospective<br>Observational   | German        | Multicentre            | 2350 (64.3)  | 3652 (33)               | Freedom from AF,<br>stroke/TIA, and<br>mortality | 1.00                | 5             |
| Kaiser et al. <sup>18</sup>    | 2016 | Retrospective<br>Observational | United States | Multicentre            | NR           | 21 091 (29)             | Stroke/TIA and<br>mortality                      | 1.00                | 6             |
| Ayoub et al. <sup>19</sup>     | 2017 | Retrospective<br>Observational | United States | Multicentre            | NR           | 20 360 (50)             | Stroke/TIA and<br>mortality                      | In-hospital         | 7             |
| Tanaka et al. <sup>20</sup>    | 2017 | Prospective<br>Observational   | Japan         | Multicentre            | 3229 (64.4)  | 5013 (27)               | Freedom from AF,<br>stroke/TIA, and<br>mortality | 2.90                | 6             |
| Yu et al. <sup>21</sup>        | 2018 | Prospective<br>Observational   | Korea         | Single                 | 557 (70.7)   | 788 (27)                | Freedom from AF,<br>stroke/TIA, and<br>mortality | 2.80                | 8             |
| Kuck et al. <sup>22</sup>      | 2018 | Prospective<br>Observational   | German        | Multicentre            | 750 (100.0)  | 750 (39)                | Freedom from AF,<br>stroke/TIA, and<br>mortality | 1.50                | 6             |
| Elayi et al. <sup>23</sup>     | 2018 | Retrospective<br>Observational | United States | Multicentre            | NR           | 85 977 (32)             | Stroke/TIA and<br>mortality                      | In-hospital         | 6             |
| Roh et al. <sup>24</sup>       | 2018 | Retrospective<br>Observational | Korea         | Single                 | 510 (69.5)   | 734 (50)                | Freedom from AF,<br>stroke/TIA, and<br>mortality | 4.58                | 8             |

AF, atrial fibrillation; NOS, Newcastle–Ottawa quality assessment Scale; NR, no record; PAF, paroxysmal atrial fibrillation; TIA, transient ischaemic attack.

**Table 2** Baseline demographics in the included studies for the different endpoints

| Dichotomous              | The demographics of freedom from AF/AT |                   |                 |         | The demographics of complications |                   |                 |         |
|--------------------------|----------------------------------------|-------------------|-----------------|---------|-----------------------------------|-------------------|-----------------|---------|
|                          | Total patients                         | Women, % (n)      | Men, % (n)      | P-value | Total patients                    | Women, % (n)      | Men, % (n)      | P-value |
| PAF                      | 18 514                                 | 70.0 (3586)       | 63.1 (8454)     | <0.0001 | 18 741                            | 71.3 (3795)       | 64.8 (8698)     | <0.0001 |
| DM                       | 12 291                                 | 8.6 (293)         | 10.4 (928)      | 0.0024  | 120 293                           | 17.2 (6487)       | 15.1 (12447)    | <0.0001 |
| CAD                      | 12 146                                 | 8.4 (283)         | 14.2 (1247)     | <0.0001 | 120 008                           | 13.8 (5187)       | 18.3 (15026)    | <0.0001 |
| Hypertension             | 9265                                   | 49.0 (1187)       | 41.2 (2821)     | <0.0001 | 117 267                           | 60.2 (22144)      | 54.8 (44129)    | <0.0001 |
| Previous stroke          | 8072                                   | 5.8 (119)         | 4.0 (243)       | 0.0007  | 116 641                           | 4.4 (1613)        | 3.1 (2503)      | <0.0001 |
| HF                       | 7891                                   | 7.7 (199)         | 7.1 (377)       | 0.2862  | 31 051                            | 23.8 (2237)       | 25.5 (5522)     | 0.0014  |
| Prior MI                 | 5526                                   | 2.2 (38)          | 4.7 (176)       | <0.0001 | 112 594                           | 3.9 (1368)        | 6.3 (4881)      | <0.0001 |
| VHD                      | 5510                                   | 7.7 (140)         | 6.2 (230)       | 0.0463  | 26 601                            | 1.8 (140)         | 1.2 (230)       | 0.0009  |
| CKD                      | 1302                                   | 1.5 (8)           | 1.8 (14)        | 0.7247  | 109 871                           | 5.2 (1830)        | 4.4 (3265)      | <0.0001 |
| Continuous               | Total Patients                         | Women (Mean ± SD) | Men (Mean ± SD) | P-value | Total Patients                    | Women (Mean ± SD) | Men (Mean ± SD) | P-value |
| Age (years)              | 18 514                                 | 63.2 ± 10.4       | 59.0 ± 13.6     | <0.0001 | 125 809                           | 64.4 ± 11.0       | 59.6 ± 11.1     | <0.0001 |
| BMI (kg/m <sup>2</sup> ) | 8072                                   | 26.6 ± 6.2        | 27.1 ± 7.1      | 0.0046  | 9573                              | 26.1 ± 5.7        | 26.9 ± 6.7      | <0.0001 |
| Duration (AF) (years)    | 8639                                   | 5.6 ± 7.2         | 5.3 ± 7.9       | 0.1156  | 7504                              | 5.5 ± 7.4         | 5.3 ± 8.2       | 0.3478  |
| LVEF (%)                 | 7936                                   | 60.2 ± 8.6        | 55.4 ± 9.3      | <0.0001 | 8730                              | 60.4 ± 7.9        | 56.1 ± 9.3      | <0.0001 |
| LAD (mm)                 | 8072                                   | 40.7 ± 6.6        | 43.3 ± 5.6      | <0.0001 | 9573                              | 40.7 ± 6.1        | 43.0 ± 5.8      | <0.0001 |
| Failed AADs (n)          | 5966                                   | 2.3 ± 1.7         | 1.8 ± 2.4       | <0.0001 | 5966                              | 2.3 ± 1.7         | 1.8 ± 2.4       | <0.0001 |

AAD, antiarrhythmic drug; AF, atrial fibrillation; AT, atrial tachycardia; BMI, body mass index; CAD, coronary artery disease; CKD, chronic kidney disease; DM, diabetes mellitus; HF, heart failure; LAD, left atrial diameter; LVEF, left ventricular ejection fraction; MI, myocardial infarction; PAF, paroxysmal atrial fibrillation; SD, standard deviation; VHD, valvular heart disease.

single ablation procedure (OR: 0.82, 95% CI: 0.74–92;  $P=0.0005$ ), and studies with comparable baseline characteristics (OR: 0.68, 95% CI: 0.55–83;  $P=0.0001$ ).

### Stroke/transient ischaemic attack

Fourteen studies were included in the analysis of stroke/TIA. There were 654 (0.44%) events among 148 173 participants. Pooled analysis showed that female sex was associated with an increased risk of stroke/TIA compared with male sex (0.51% vs. 0.41%; OR: 1.42, 95% CI: 1.21–1.67;  $P<0.0001$ ;  $I^2=0$ ,  $P=0.46$ ; [Supplementary material online, Figure S3](#)). Similarly, the sex-related difference in the risk of stroke/TIA was independent of follow-up time (in-hospital 0.48% vs. 0.38%; OR: 1.44, 95% CI: 1.22–1.71;  $P<0.0001$ ; at 1-year follow-up 1.42% vs. 1.08%; OR: 1.32, 95% CI: 1.07–1.63;  $P=0.009$ ; [Figure 3](#)).

### All-cause mortality

Fourteen studies with 146 885 patients investigated the sex-related difference in all-cause mortality. Moderate heterogeneity was detected in these studies ( $I^2=36\%$ ,  $P=0.11$ ; [Figure 4](#)), and there were 352 (0.24%) deaths during the in-hospital or follow-up periods. Pooled analysis showed that female sex was associated with a higher risk of all-cause mortality compared with male sex (0.27% vs. 0.22%; OR: 1.53, 95% CI: 1.02–2.28;  $P=0.04$ ;  $I^2=36\%$ ,  $P=0.11$ ; [Figure 4](#)). The sex-related difference in the risk of all-cause mortality was still significant during the in-hospital stay (OR: 0.17% vs. 0.12%; 1.57, 95% CI: 1.18–2.09;  $P=0.002$ ; [Supplementary material online, Figure S4](#)). There was no significant difference at 1-year follow-up (OR: 1.28 vs. 1.01%; 1.62, 95% CI 0.73–3.59;  $P=0.24$ ).

### Major complications

Our analysis indicated that women undergoing catheter ablation of AF had an increased risk of pericardial effusion/tamponade (OR: 1.57, 95% CI: 1.31–1.88;  $P<0.0001$ ; [Figure 5A](#)), major bleeding requiring transfusion (OR: 2.46, 95% CI: 1.89–3.21;  $P<0.0001$ ; [Figure 5B](#)), PMI (OR: 2.44, 95% CI: 1.90–3.13;  $P<0.0001$ ; [Figure 5C](#)), and a trend towards an increasing risk of PV stenosis (OR: 2.11, 95% CI: 0.93–4.77;  $P=0.07$ ; [Figure 5D](#)). However, there was no significant difference in the risk of ACS between the two groups (OR: 0.78, 95% CI: 0.52–1.18;  $P=0.24$ ; [Figure 5E](#)).

### Sensitivity, subgroup, and meta-regression analysis

Sensitivity analysis (using the single-study-removed method) showed good stability in the clinical endpoints of freedom from AF/AT recurrence, stroke/TIA, and all-cause mortality ([Supplementary material online, Figure S5](#)). Moreover, after excluding the largest sample size study by Elayi *et al.*,<sup>23</sup> female sex was still associated with a higher risk of stroke/TIA (OR: 1.30, 95% CI: 1.02–1.65;  $P=0.03$ ) and a trend for increasing risk of mortality (OR: 1.73, 95% CI: 0.96–3.12;  $P=0.07$ ) compared with male sex. If the excluded studies with more than 200 patients (six studies involving 1598 patients) were included in the quantitative synthesis, we found that the result of each primary endpoint was still similar to previous findings ([Supplementary material online, Figure S6](#)). For endpoints of freedom from AF/AT recurrence and stroke/TIA, the results were similar to previous findings in the subgroup of prospective studies, older patients, and high-quality studies ([Supplementary material online, Table S4](#)). In the subgroup of

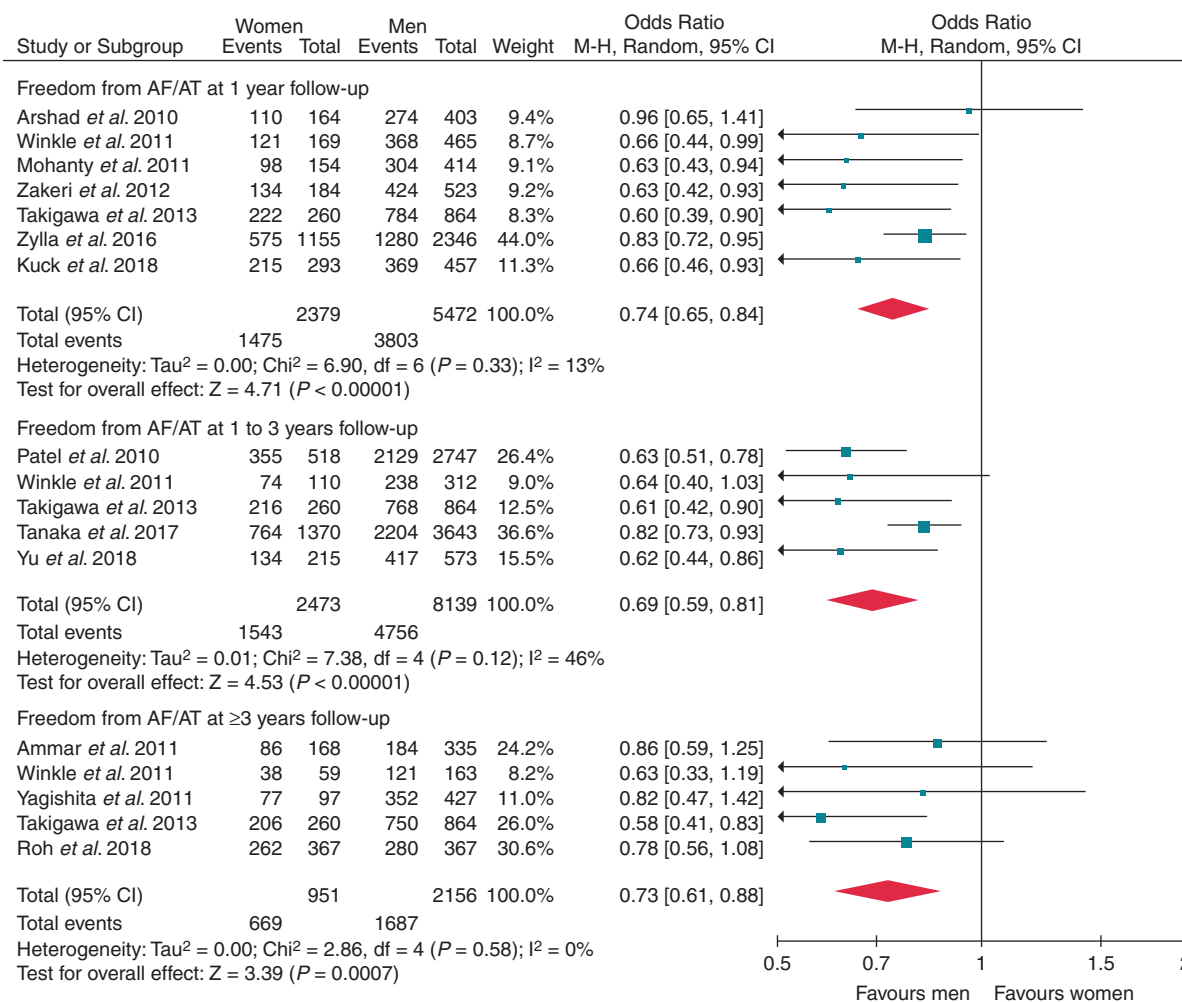

**Figure 2** Forest plot of freedom from AF/AT in women vs. men at 1-, 1 to 3-, and  $\geq 3$ -year follow-up after catheter ablation. AF, atrial fibrillation; AT, atrial tachycardia; CI, confidence interval.

retrospective studies, the risk of all-cause mortality was higher in women than in men (OR: 2.22, 95% CI 1.06–4.63;  $P = 0.034$ ). However, there was no significant difference between the two genders in the subgroup of prospective studies (OR: 1.19, 95% CI: 0.69–2.05;  $P = 0.53$ ). For the primary endpoints, meta-regression indicated that no significant correlation between the preselected covariates and the overall treatment effect of catheter ablation was observed (Supplementary material online, Table S5).

### Publication bias

For the primary endpoints, visual inspection of the funnel plot including all studies showed symmetry, indicating a low risk of publication bias (Supplementary material online, Figure S7). Moreover, Egger and Begg tests showed that no significant potential publication bias existed in each primary endpoint ( $P_{\text{begg}} = 0.669$  and  $P_{\text{egger}} = 0.138$  for freedom from AF/AT recurrence;  $P_{\text{begg}} = 0.827$  and  $P_{\text{egger}} = 0.660$  for stroke/TIA;  $P_{\text{begg}} = 0.533$  and  $P_{\text{egger}} = 0.171$  for all-cause mortality).

## Discussion

Incorporating the available published evidence, we found that the rate of freedom from AF/AT recurrence was lower in women than men after catheter ablation of AF. Moreover, women might have an increased risk of stroke/TIA and all-cause mortality compared with men. Additionally, women were more likely than men to experience pericardial effusion/tamponade, major bleeding, and pacemaker implantation.

In agreement with a prior study,<sup>25</sup> our data showed that 66.5% of patients were free from AF/AT at the 2.4-year follow-up. Despite a higher prevalence of paroxysmal AF and less enlargement of LA diameter, long-term success rates were lower in females than males. Patel *et al.*<sup>7</sup> found that females experienced more AF recurrence than males after PV isolation. It was noted that females scheduled to undergo ablation in this study were older and had less paroxysmal AF and more comorbidities, which were attributed to more advanced structural remodelling and led to lower success rates. However, two

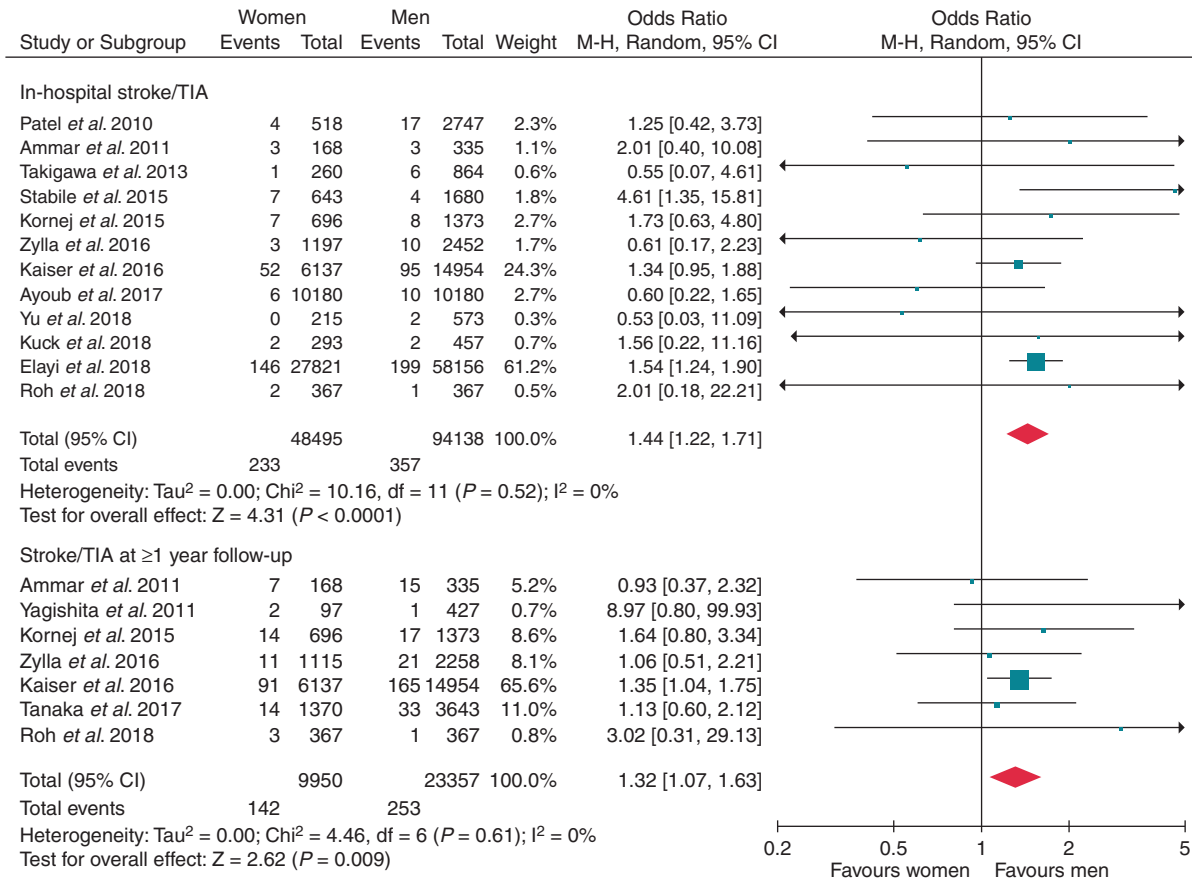

**Figure 3** Forest plot of stroke/TIA in women vs. men in-hospital and ≥1-year follow-up after catheter ablation. CI, confidence interval; TIA, transient ischaemic attack.

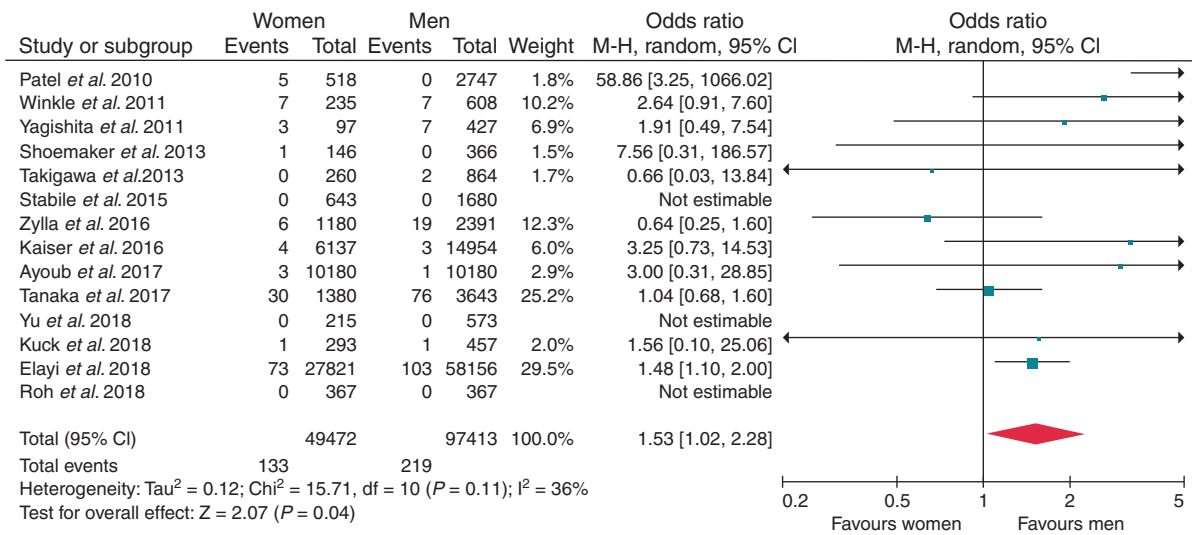

**Figure 4** Forest plot of all-cause mortality in women vs. men after catheter ablation.

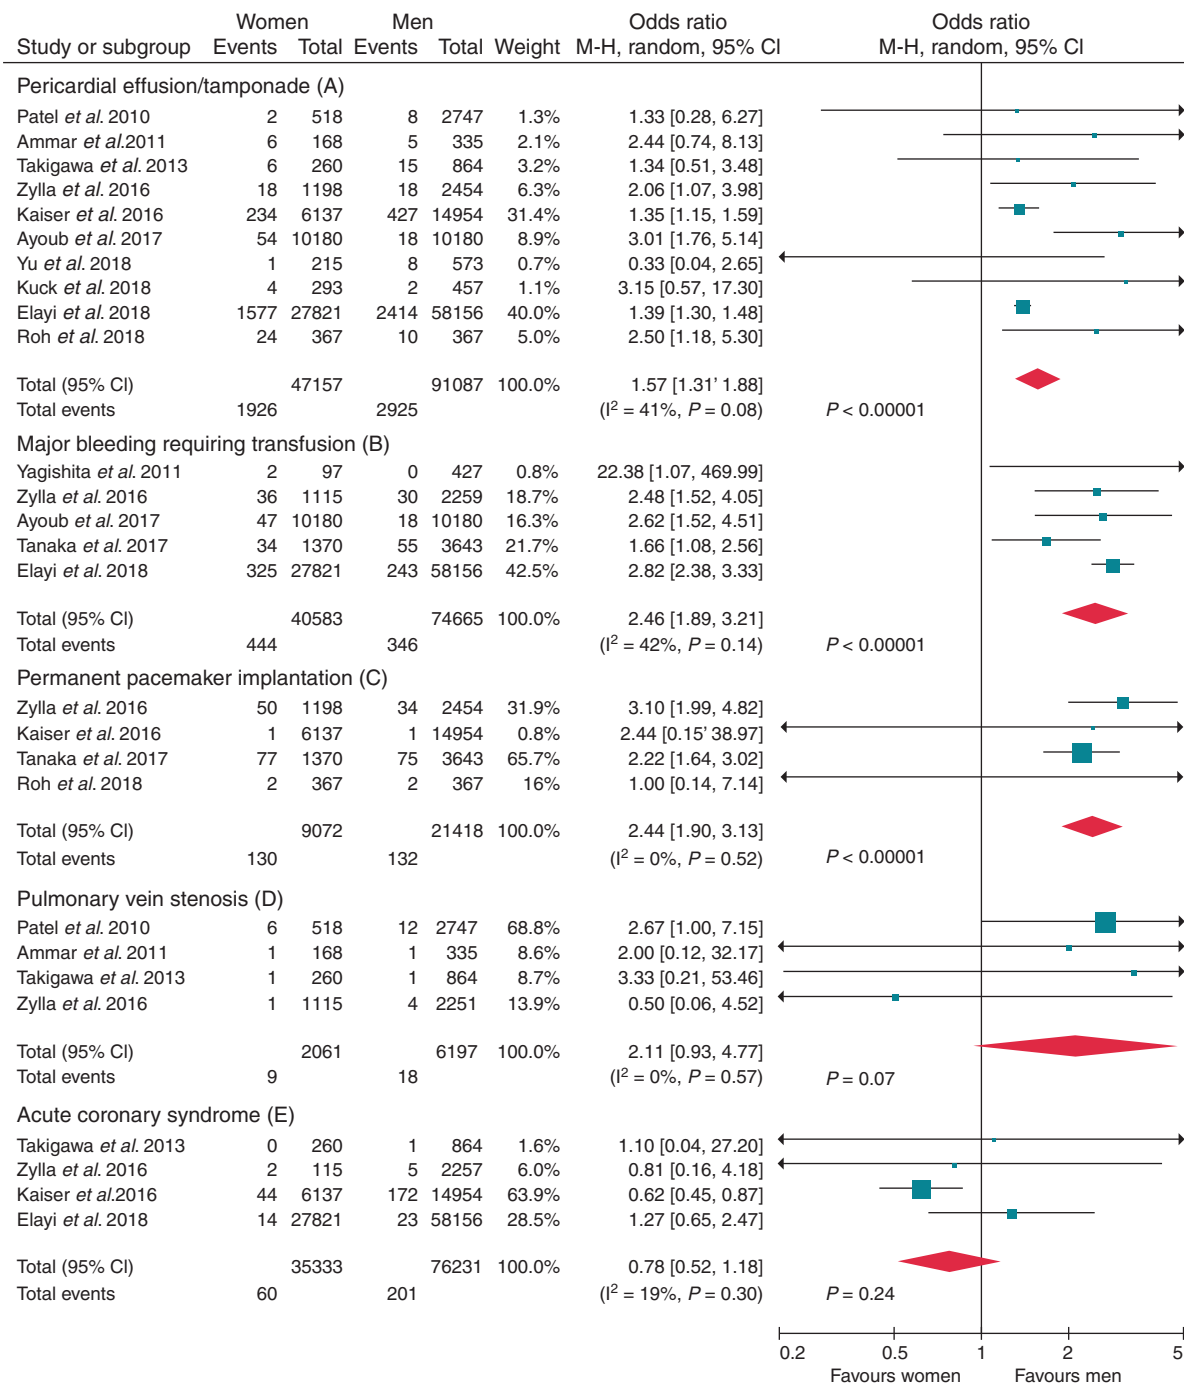

**Figure 5** Forest plot of pericardial effusion/tamponade (A), major bleeding requiring transfusion (B), permanent pacemaker implantation (C), pulmonary vein stenosis (D), and acute coronary syndrome (E) in women vs. men after catheter ablation. CI, confidence interval.

studies with comparable baselines also found that women experience higher recurrence than men.<sup>11,21</sup> Moreover, in the subset of patients with a single ablation procedure and patients off AAD, the results were also similar to our findings. Sex-specific differences in physiological, electrical, and structural characteristics of the atria, which might result in higher AF recurrence in the female than male sex, include lower repolarizing ion currents, prolonged action potential duration

in female atria, greater frequency of non-pulmonary triggered activity, and more pronounced AF-associated fibrotic remodelling.<sup>7,26,27</sup>

It is well established that females with AF have an increased risk for stroke in comparison with males even after adjustment for risk factors.<sup>28</sup> In accordance with previous findings,<sup>29</sup> 0.44% in-hospital stroke/TIA was reported in our study. The risk of stroke/TIA was 1.4-fold higher in-hospital stay and was 1.3-fold higher at the 1-year



follow-up in women than in men. The increased risk of stroke/TIA may be explained by three factors. First, women undergoing PV isolation were older with increased comorbidities. Second, the long-term success rate was lower in women. Third, genetic factors, vascular biology, hormonal, or thromboembolic factors that differ between women and men might lead to a higher risk of stroke.<sup>27</sup> It is important for physicians to discuss the ongoing risks and benefits of anticoagulant therapy, particularly when coupled with a high CHA<sub>2</sub>DS<sub>2</sub>-VASc score and the high likelihood of recurrence of AF.

In the present study, the risk of in-hospital mortality was extremely low (~0.14%). These findings were in line with the 0.06–0.60% estimated death risk for catheter ablation of AF.<sup>30,31</sup> Several studies have attempted to address potential sex-specific differences in the risk of death,<sup>17,18</sup> and showed no obvious difference between women and men. It was notable that the findings of these studies were limited by small sample sizes. Our data analysed over 140 000 patients and found that female sex might be associated with an increased risk of all-cause mortality, especially for in-hospital mortality. The increased risk of death may be partially explained by the fact that women undergoing catheter ablation were older and had increased comorbidities and major complications. Nevertheless, there was no significant difference between the two genders in the subgroup of prospective studies. Thus, considering the discrepancy of baseline characteristics and the inconsistent findings between retrospective and prospective studies, our findings on all-cause mortality still need to be confirmed in the future.

Our data showed that female sex was associated with a significantly increased risk of major complications after catheter ablation, which agreed with previous findings.<sup>18,19</sup> Michowitz *et al.*<sup>32</sup> found that women have a 1.83-fold higher risk for developing cardiac tamponade, slightly higher than our results (1.57-fold). The increased risk of major bleeding might be due to the higher prevalence of chronic kidney disease in women than men. The increased risk of PMI in women may be explained by the fact that women were more often prescribed AAD therapy than invasive catheter ablation,<sup>33</sup> and excessive use of AAD may potentially trigger symptomatic bradycardia. A possible explanation for sex-related differences in major complications in women was that females were more likely to be older and to have increased comorbidities. Nevertheless, Ayoub *et al.*<sup>19</sup> conducted a propensity score-matched study and confirmed that females were at higher risk of developing post-operative major complications than males. A higher complication risk in women suggested that incremental caution and preoperative discussion of anticipated risk in women are completely necessary.

## Strengths and limitations

Our analysis included 19 studies (available in the literature to date) from multiple centres and countries. It is the largest study aiming to provide physicians and their patients with real-world information about sex-specific outcomes of catheter ablation. However, this meta-analysis has several limitations. First, 10 of these included studies are retrospective in nature, subjecting our results to possible bias. Although we tried to conquer this limitation by the fulfilment of multiple sensitivity and subgroup analyses and meta-regression analyses, selection bias could still not be ruled out. Second, for clinical endpoints of safety, female sex undergoing catheter ablation had increased preoperative cardiovascular risk. Whether the poorer in-

hospital and long-term outcomes after catheter ablation in women can be counterbalanced by these increased risks of intervention are unclear. Third, detailed information regarding AF type, strategy of ablation, and perioperative medication use (AAD,  $\beta$ -blocker, platelet inhibitors, and anticoagulant) in most studies was not available. Therefore, unmeasured confounders may exist in our findings. Lastly, the available data in studies did not allow for a separate analysis for cardiac and non-cardiac death, haemorrhagic, and non-haemorrhagic stroke.

## Conclusions

In summary, data from our meta-analysis suggested that female sex might be associated with a lower proportion of patients free from AF/AT recurrence after catheter ablation of AF. Moreover, female sex was associated with an increased risk of stroke/TIA. In addition, major complications were more often in the female sex. The reasons for these sex-related differences in catheter ablation of AF need to be further studied.

## Supplementary material

Supplementary material is available at *Europace* online.

**Conflict of interest:** none declared.

## References

1. Calkins H, Hindricks G, Cappato R, Kim YH, Saad EB, Aguinaga L *et al.* 2017 HRS/EHRA/ECAS/APHS/SOLAECE expert consensus statement on catheter and surgical ablation of atrial fibrillation: executive summary. *Europace* 2018;**20**: 157–208.
2. Ko D, Rahman F, Martins MA, Hylek EM, Ellinor PT, Schnabel RB *et al.* Atrial fibrillation in women: treatment. *Nat Rev Cardiol* 2017;**14**:113–24.
3. Piccini JP, Lopes RD, Kong MH, Hasselblad V, Jackson K, Al-Khatib SM. Pulmonary vein isolation for the maintenance of sinus rhythm in patients with atrial fibrillation: a meta-analysis of randomized, controlled trials. *Circ Arrhythm Electrophysiol* 2009;**2**:626–33.
4. Shamseer L, Moher D, Clarke M, Ghersi D, Liberati A, Petticrew M *et al.* Preferred reporting items for systematic review and meta-analysis protocols (PRISMA-P) 2015: elaboration and explanation. *BMJ* 2015;**350**:g7647.
5. Wells GA, Shea B, O'Connell D, Peterson J, Welch V, Losos M, *et al.* The Newcastle–Ottawa Scale (NOS) for Assessing the Quality of Nonrandomised Studies in Meta-Analyses. Ottawa, Ontario, Canada: Ottawa Hospital Research Institute. [http://www.ohri.ca/programs/clinical\\_epidemiology/oxford.asp](http://www.ohri.ca/programs/clinical_epidemiology/oxford.asp) (November 2018, date last accessed).
6. Arshad A, Gariikipati NV, Paruchuri VP, Avula A, Mittal S, Steinberg JS *et al.* Women have a higher complication rate when undergoing ablation for atrial fibrillation. *J Am Coll Cardiol* 2010;**55**:A5–E45.
7. Patel D, Mohanty P, Di Biase L, Sanchez JE, Shaheen MH, Burkhardt JD *et al.* Outcomes and complications of catheter ablation for atrial fibrillation in females. *Heart Rhythm* 2010;**7**:167–72.
8. Ammar S, Fichtner S, Reents T, Wu J, Jilek C, Kolb C *et al.* Outcome of catheter ablation of paroxysmal atrial fibrillation: are women equal to men? *Europace* 2011;**13**(Suppl).
9. Winkle RA, Mead RH, Engel G, Patrawala RA. Long-term results of atrial fibrillation ablation: the importance of all initial ablation failures undergoing a repeat ablation. *Am Heart J* 2011;**162**:193–200.
10. Yagshita A, Takahashi Y, Takahashi A, Fujii A, Kusa S, Fujino T *et al.* Incidence of late thromboembolic events after catheter ablation of atrial fibrillation. *Circ J* 2011;**75**:2343–9.
11. Mohanty S, Mohanty P, Di Biase L, Rong B, Burkhardt D, Gallinghouse JG *et al.* Baseline B-type natriuretic peptide: a gender-specific predictor of procedure-outcome in atrial fibrillation patients undergoing catheter ablation. *J Cardiovasc Electrophysiol* 2011;**22**:858–65.
12. Zakeri R, Cha Y-M, Hodge DO, Wu JH, Monahan KH, Packer DL *et al.* Diastolic dysfunction may underlie sex differences in outcome following catheter ablation

- for atrial fibrillation in patients with preserved ejection fraction. *Circulation* 2012; **126**:A17695.
13. Shoemaker MB, Muhammad R, Farrell M, Farrell M, Parvez B, White BW et al. Relation of morbid obesity and female gender to risk of procedural complications in patients undergoing atrial fibrillation ablation. *Am J Cardiol* 2013; **111**:368–73.
  14. Takigawa M, Kuwahara T, Takahashi A, Watari Y, Okubo K, Takahashi Y et al. Differences in catheter ablation of paroxysmal atrial fibrillation between males and females. *Int J Cardiol* 2013; **168**:1984–91.
  15. Stabile G, Bertaglia E, Pappone C, Themistoclakis S, Tondo C, Zorzi A et al. Influence of age and gender on complications of catheter ablation for atrial fibrillation. *J Atr Fibrillation* 2015; **7**:1197.
  16. Kornej J, Kosiuk J, Hindricks G, Arya A, Sommer P, Rolf S et al. Sex-related predictors for thromboembolic events after catheter ablation of atrial fibrillation: the Leipzig Heart Center AF Ablation Registry. *Clin Res Cardiol* 2015; **104**:603–10.
  17. Zylla MM, Brachmann J, Lewalter T, Hoffmann E, Kuck KH, Andresen D et al. Sex-related outcome of atrial fibrillation ablation: insights from the German Ablation Registry. *Heart Rhythm* 2016; **13**:1837–44.
  18. Kaiser DW, Fan J, Schmitt S, Than CT, Ullal AJ, Piccini JP et al. Gender differences in clinical outcomes after catheter ablation of atrial fibrillation. *JACC Clin Electrophysiol* 2016; **2**:703–10.
  19. Ayoub K, Marji M, Ayoub B, Faramawi M, Maskoun W. Gender-related differences in catheter ablation of atrial fibrillation: results from the nationwide inpatient sample database. *Circulation* 2017; **136**:A14026.
  20. Tanaka N, Inoue K, Shizuta S, Kobori A, Kaitani K, Morimoto T et al. Gender differences in the efficacy and outcome of atrial fibrillation ablation: insights from the Kansai Plus Atrial Fibrillation (KPAF) registry. *Circulation* 2017; **136**:A18972.
  21. Yu HT, Yang PS, Kim TH, Uhm JS, Kim JY, Joung B et al. Poor rhythm outcome of catheter ablation for early-onset atrial fibrillation in women—mechanistic insight. *Circ J* 2018; **82**:2259–68.
  22. Kuck KH, Brugada J, Fürnkranz A, Chun KRJ, Metzner A, Ouyang F et al. Impact of female sex on clinical outcomes in the FIRE AND ICE trial of catheter ablation for atrial fibrillation. *Circ Arrhythm Electrophysiol* 2018; **11**:e006204.
  23. Elayi CS, Darrat Y, Suffredini JM, Misumida N, Shah J, Morales G et al. Sex differences in complications of catheter ablation for atrial fibrillation: results on 85,977 patients. *J Interv Card Electrophysiol* 2018; **53**:333–9.
  24. Roh SY, Shim J, Lee KN, Ahn J, Kim DH, Lee DI et al. Gender-related difference in clinical outcome of the patient with atrial fibrillation after radiofrequency catheter ablation. *Korean Circ J* 2018; **48**:605–18.
  25. Cheng X, Hu Q, Zhou C, Liu LQ, Chen T, Liu Z et al. The long-term efficacy of cryoballoon vs irrigated radiofrequency ablation for the treatment of atrial fibrillation: a meta-analysis. *Int J Cardiol* 2015; **181**:297–302.
  26. Akoum N, Mahnkopf C, Kholmovski EG, Brachmann J, Marrouche NF. Age and sex differences in atrial fibrosis among patients with atrial fibrillation. *Europace* 2018; **20**:1086–92.
  27. Odening KE, Deiß S, Dilling-Boer D, Didenko M, Eriksson U, Nedios S et al. Mechanisms of sex differences in atrial fibrillation: role of hormones and differences in electrophysiology, structure, function, and remodelling. *Europace* 2019; **21**:366–76.
  28. Marzona I, Proietti M, Farcomeni A, Romiti GF, Romanazzi I, Raparelli V et al. Sex differences in stroke and major adverse clinical events in patients with atrial fibrillation: a systematic review and meta-analysis of 993,600 patients. *Int J Cardiol* 2018; **269**:182–91.
  29. Srivatsa UN, Danielsen B, Amsterdam EA, Pezeshkian N, Yang Y, Nordsieck E et al. CAABL-AF (California Study of Ablation for Atrial Fibrillation): mortality and stroke, 2005 to 2013. *Circ Arrhythm Electrophysiol* 2018; **11**:e005739.
  30. Gupta A, Perera T, Ganesan A, Sullivan T, Lau DH, Roberts-Thomson KC et al. Complications of catheter ablation of atrial fibrillation: a systematic review. *Circ Arrhythm Electrophysiol* 2013; **6**:1082–8.
  31. König S, Ueberham L, Schuler E, Wiedemann M, Reithmann C, Seyfarth M et al. In-hospital mortality of patients with atrial arrhythmias: insights from the German-wide Helios hospital network of 161 502 patients and 34 025 arrhythmia-related procedures. *Eur Heart J* 2018; **39**:3947–57.
  32. Michowitz Y, Rahkovich M, Oral H, Zado ES, Tilz R, John S et al. Effects of sex on the incidence of cardiac tamponade after catheter ablation of atrial fibrillation: results from a worldwide survey in 34 943 atrial fibrillation ablation procedures. *Circ Arrhythm Electrophysiol* 2014; **7**:274–80.
  33. Schnabel RB, Pecun L, Ojeda FM, Lucerna M, Rzayeva N, Blankenberg S et al. Gender differences in clinical presentation and 1-year outcomes in atrial fibrillation. *Heart* 2017; **103**:1024–30.

## Corrigendum

doi:10.1093/europace/euz242

Online publish-ahead-of-print 29 August 2019

**Corrigendum to:** Gorenec B, et al. Cardiac arrhythmias in acute coronary syndromes: position paper from the joint EHRA, ACCA, and EAPCI task force [*Europace* 2014; **16**:1655–1673]

In the original version of the above article, Steen B. Kristiansen was omitted from the author list in error. This has now been corrected online.

Published on behalf of the European Society of Cardiology. All rights reserved. © The Author(s) 2019. For permissions, please email: journals.permissions@oup.com.
